# Supplementary material for: DNA methylation signature (SAM40) identifies subgroups of the Luminal A breast cancer samples with distinct survival
Source: PubMed Central journal article supplement (PMC5352035; doi:10.18632/oncotarget.13718), 2016-11-30
Supplement: oncotarget-08-1074-s001.pdf [file oncotarget-08-1074-s001.pdf]

# DNA methylation signature (SAM40) identifies subgroups of the Luminal A breast cancer samples with distinct survival

## Supplementary Materials

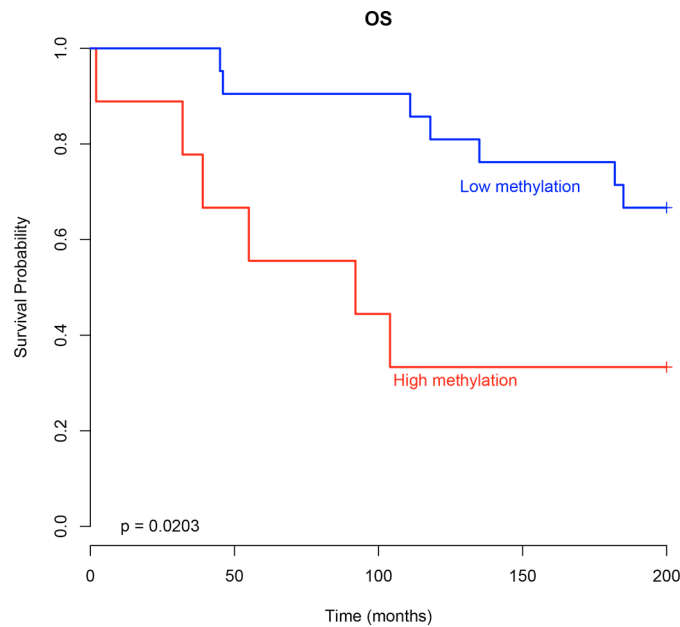

**Supplementary Figure S1: Overall survival analysis of the OsloVal study cohort.** The prognostic impact of classification using the SAM40 signature is statistically significant.

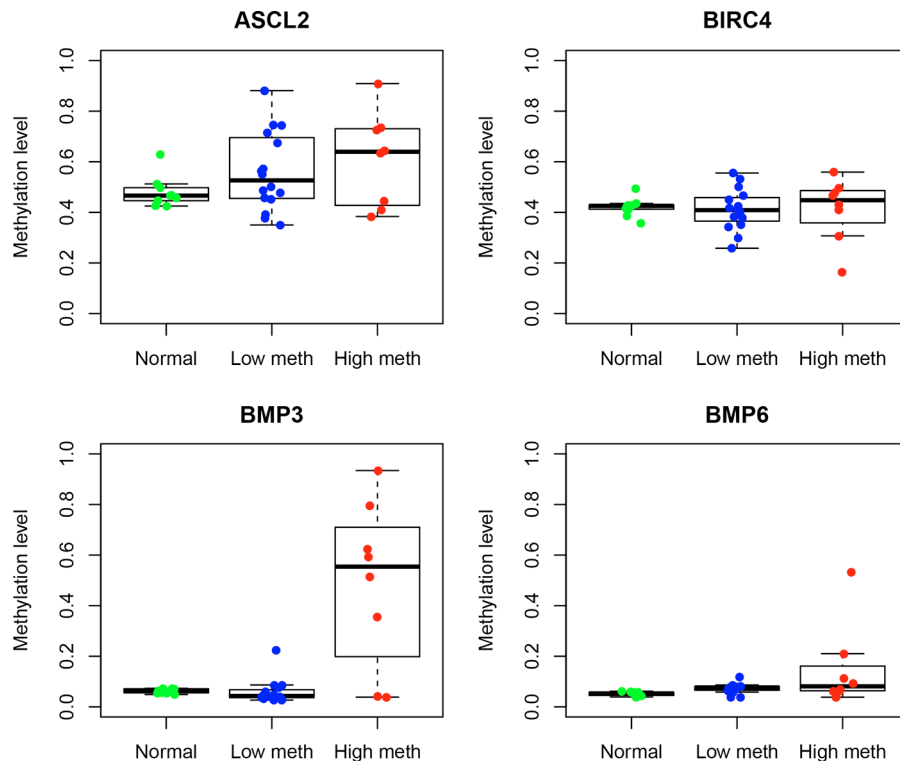

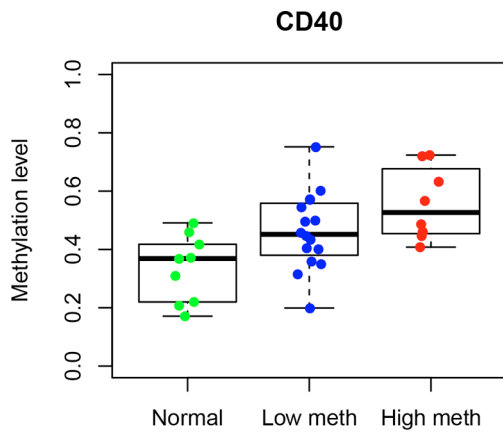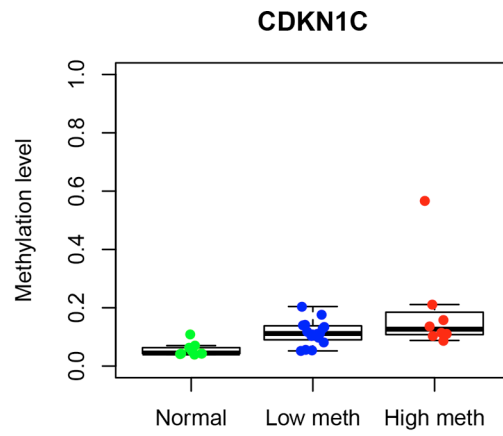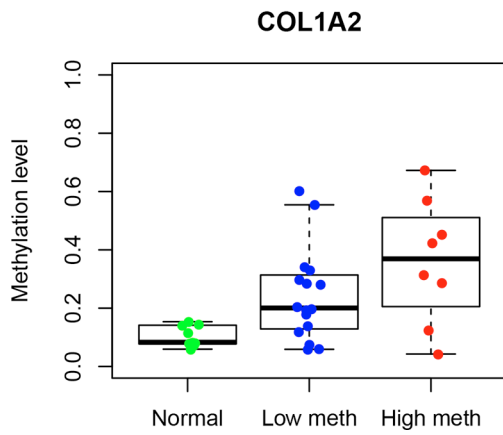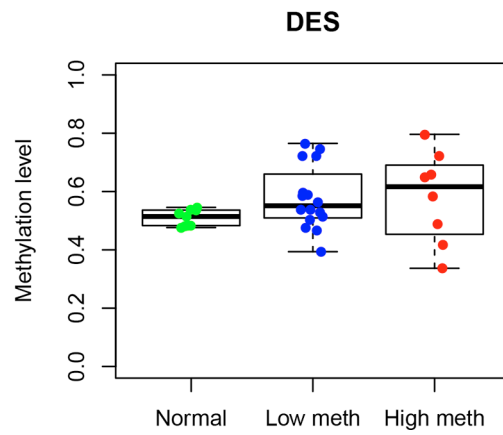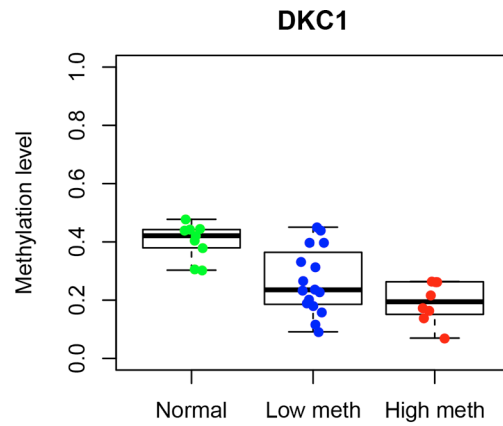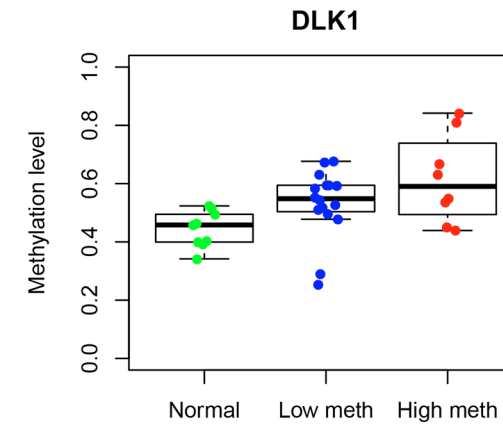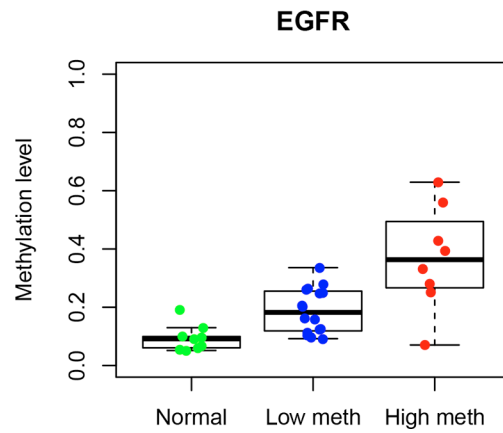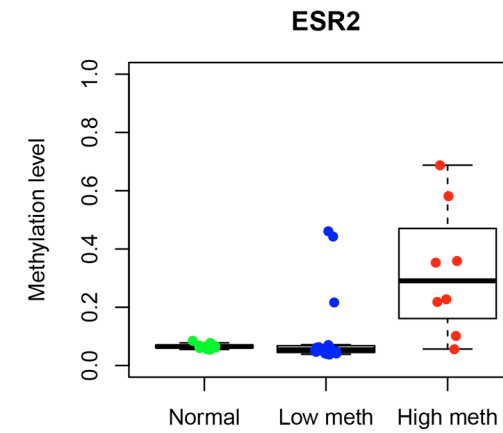

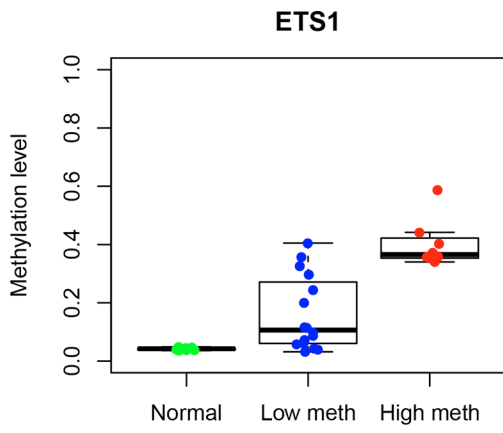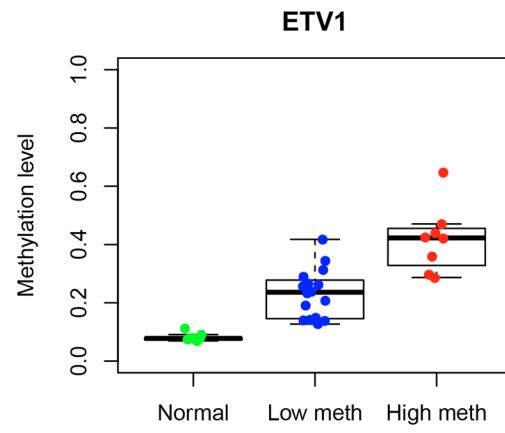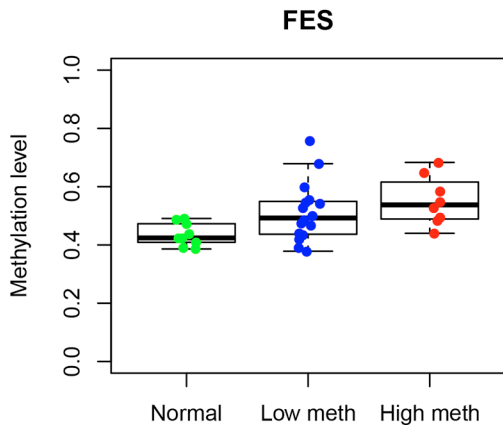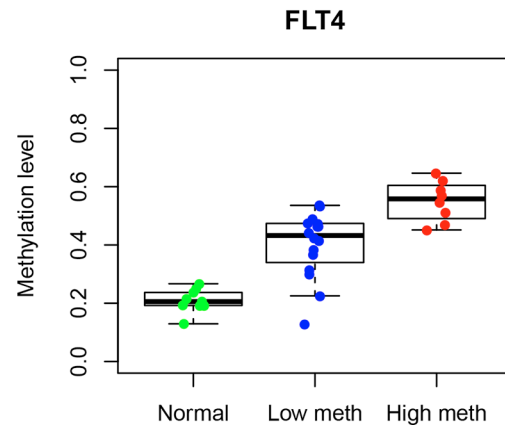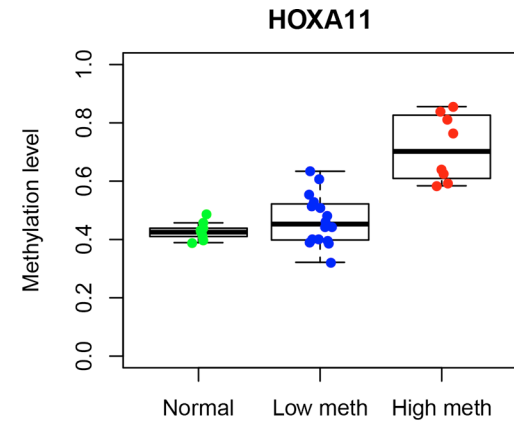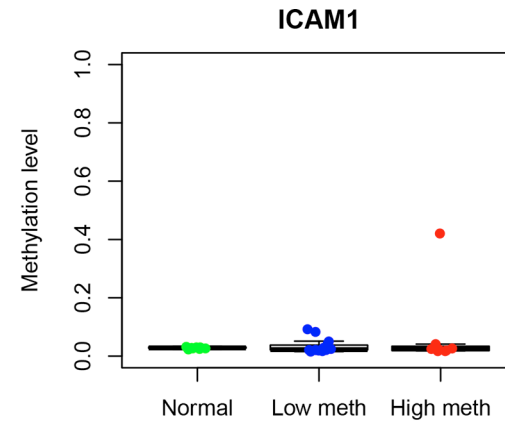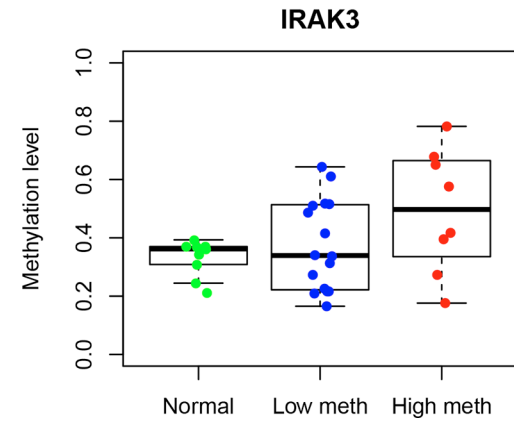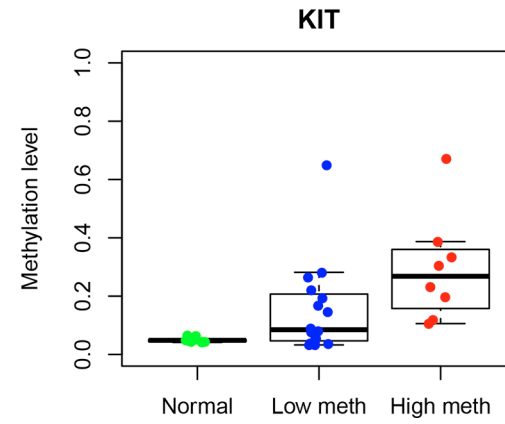

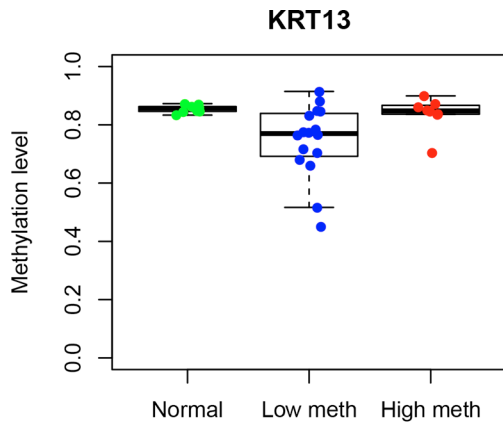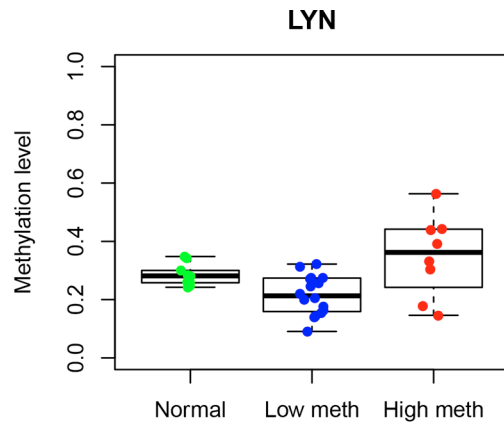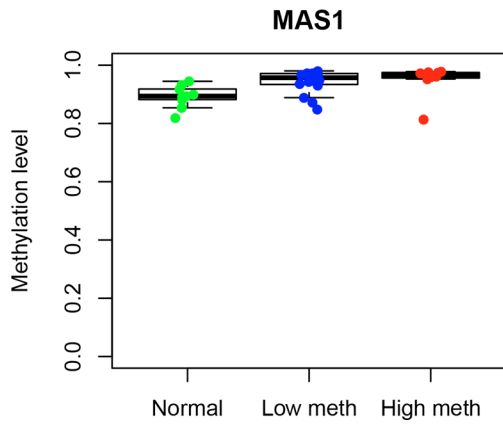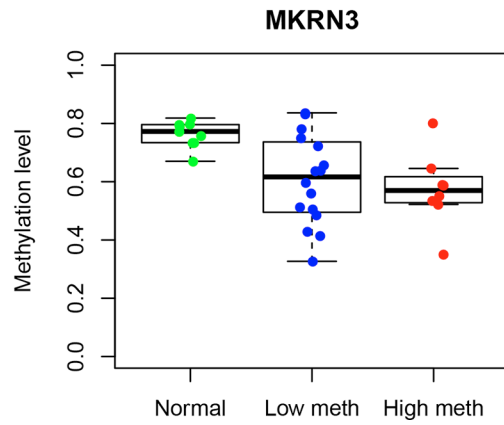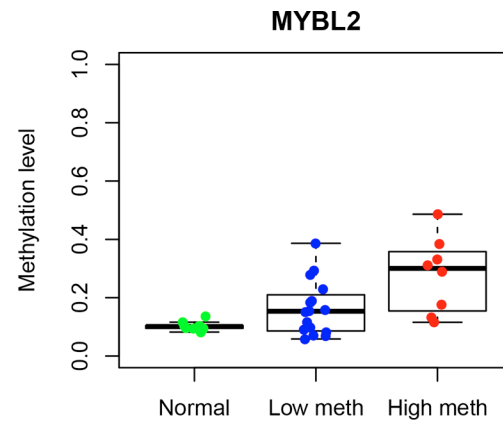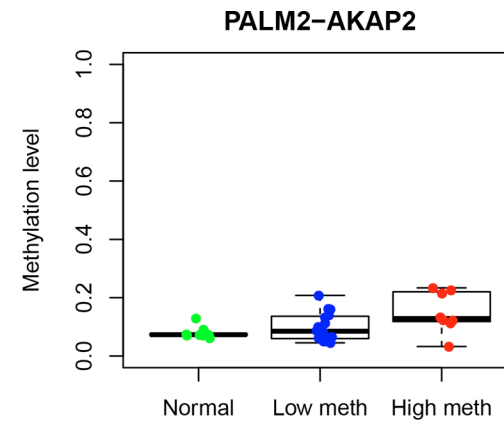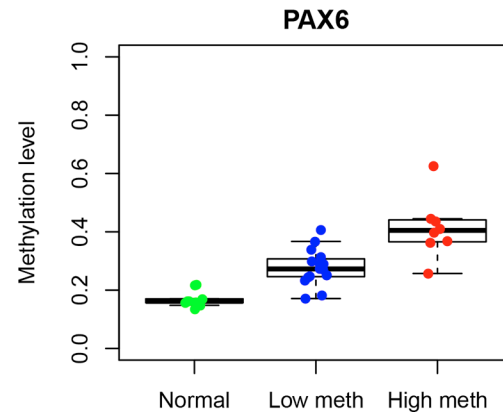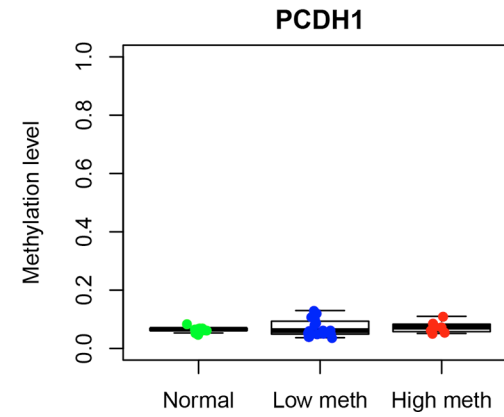

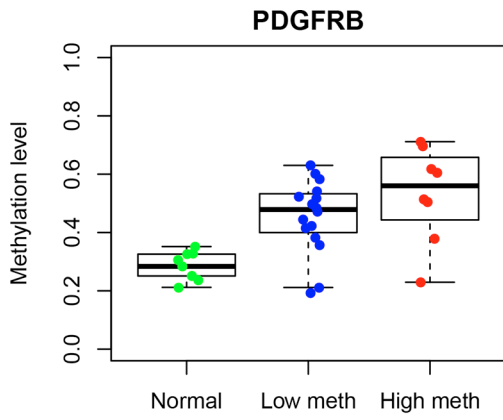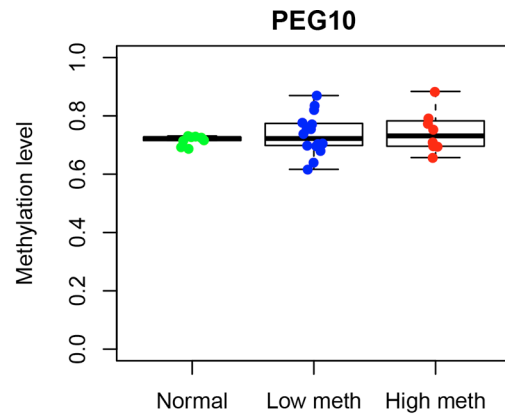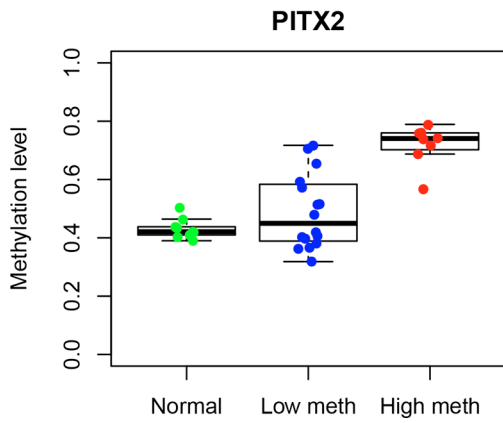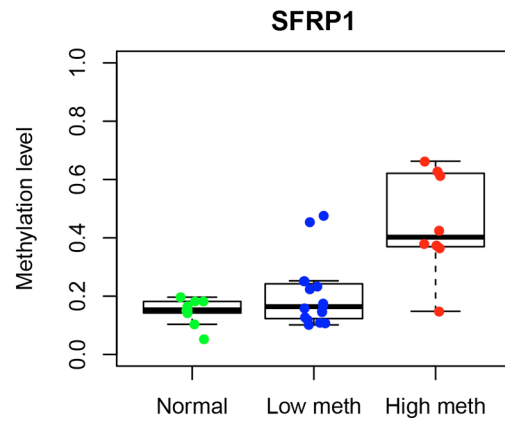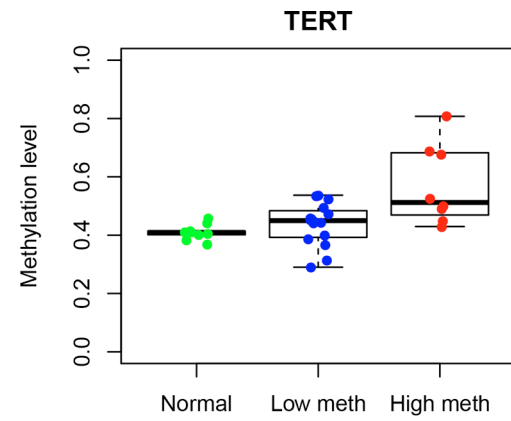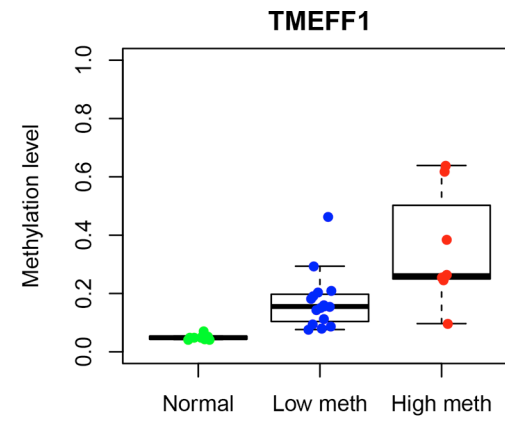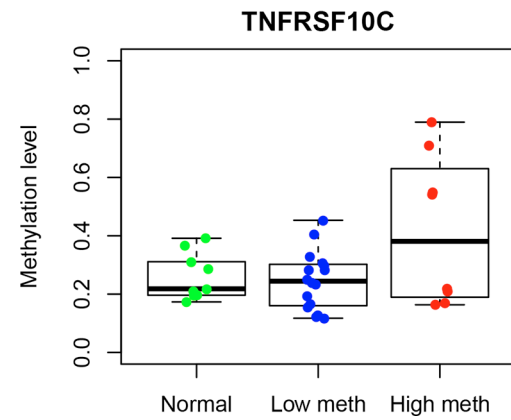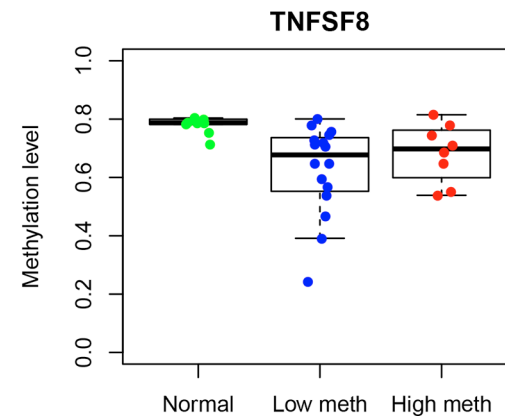

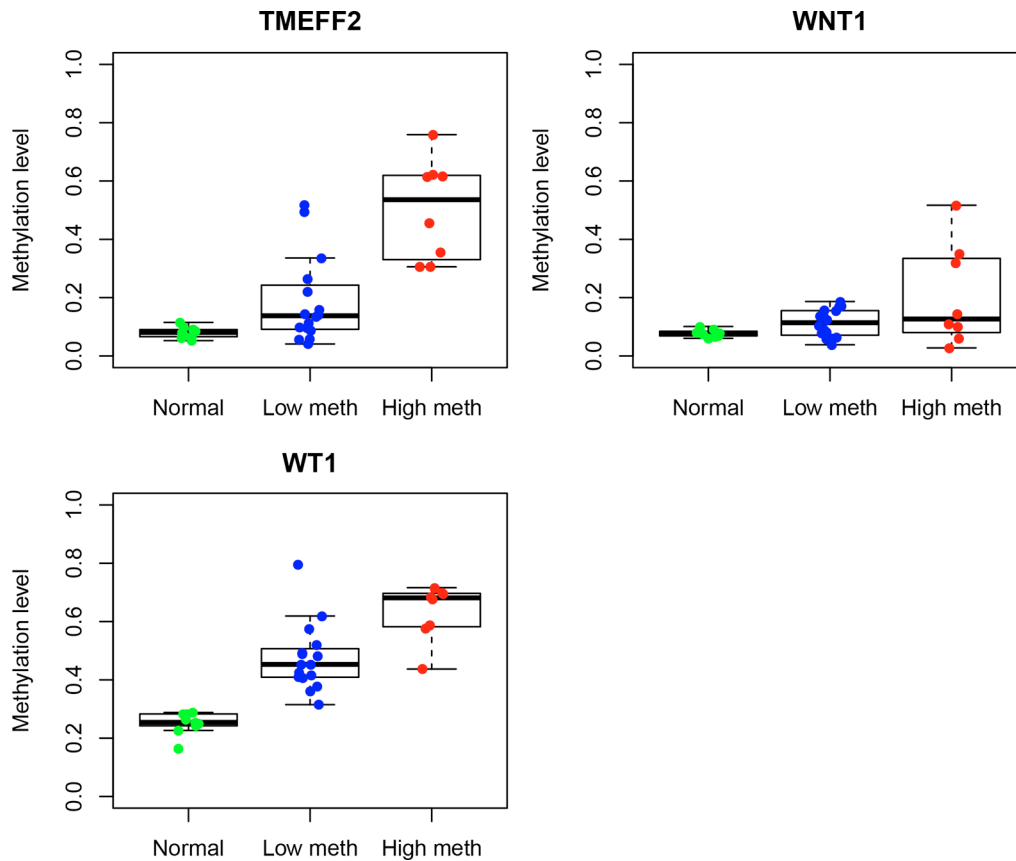

Supplementary Figure S2: Absolute methylation level for genes in the SAM40 signature.

Supplementary Table S1: Material overview

| Study cohort | Main cohort | Number of patients | Reference | Ethical approval             |
|--------------|-------------|--------------------|-----------|------------------------------|
| Norway27K    | MicMa       | 12                 | 19        | IRB approval no S-97103      |
|              | Ull         | 9                  | 20        | IRB approval no 285/05       |
|              | LB          | 3                  | 21        | IRB approval no 39/92-69.91  |
| Norway450K   | MicMa       | 16                 | 19        | IRB approval no S-97103      |
|              | FW06        | 5                  | 22        | IRB approval no Dnr 2005:118 |
| OsloVal      | MDG         | 11                 | 23        | IRB approval no S-02036      |
|              | OsloVal     | 30                 | 24        | IRB approval no 2010/498     |
| TCGA         | TCGA        | 108                | 13        | Not relevant                 |

**Supplementary Table S2: Patient characteristics for all four study cohorts**

|                                   | Norway27K <i>n</i> = 24 | Norway450K <i>n</i> = 32 | OsloVal <i>n</i> = 30 | TCGA <i>n</i> = 108 |
|-----------------------------------|-------------------------|--------------------------|-----------------------|---------------------|
| Age (median)                      | 59                      | 71                       | 60                    | 58                  |
| Age (range)                       | 43–90                   | 36–82                    | 33–85                 | 27–83               |
| Age unknown                       | 3                       | 11                       | 0                     | 0                   |
| ER negative                       | 2                       | 0                        | 2                     | 6                   |
| ER positive                       | 21                      | 32                       | 26                    | 102                 |
| ER unknown                        | 1                       | 0                        | 2                     | 0                   |
| Her2 negative                     | 10                      | 29                       | 0                     | 38                  |
| Her2 positive                     | 2                       | 1                        | 0                     | 2                   |
| Her2 unknown                      | 12                      | 2                        | 30                    | 68                  |
| Nstatus negative                  | 10                      | 7                        | 9                     | 47                  |
| Nstatus positive                  | 13                      | 7                        | 0                     | 58                  |
| Nstatus unknown                   | 1                       | 18                       | 4                     | 3                   |
| PAM50 Luminal A                   | 24                      | 32                       | 30                    | 108                 |
| PAM50 Luminal B                   | 0                       | 0                        | 0                     | 0                   |
| PAM50 Her2 enriched               | 0                       | 0                        | 0                     | 0                   |
| PAM50 Basal-like                  | 0                       | 0                        | 0                     | 0                   |
| PAM50 Normal-like                 | 0                       | 0                        | 0                     | 0                   |
| PAM50 unknown                     | 0                       | 0                        | 0                     | 0                   |
| TP53 wild type                    | 23                      | 26                       | 0                     | 0                   |
| TP53 mutated                      | 1                       | 1                        | 0                     | 0                   |
| TP53 unknown                      | 0                       | 5                        | 30                    | 108                 |
| Tstatus 1                         | 9                       | 8                        | 14                    | 31                  |
| Tstatus 2                         | 10                      | 6                        | 10                    | 58                  |
| Tstatus 3                         | 2                       | 0                        | 2                     | 16                  |
| Tstatus 4                         | 1                       | 1                        | 2                     | 2                   |
| Tstatus unknown                   | 2                       | 17                       | 2                     | 1                   |
| Received adjuvant chemotherapy    | 8                       | 2                        | 6                     | 30                  |
| No adjuvant chemotherapy          | 16                      | 19                       | 18                    | 38                  |
| Unknown adjuvant chemotherapy     | 0                       | 11                       | 6                     | 40                  |
| Received adjuvant hormone therapy | 12                      | 10                       | 6                     | 39                  |
| No adjuvant hormone therapy       | 12                      | 11                       | 18                    | 29                  |
| Unknown adjuvant hormone therapy  | 0                       | 11                       | 6                     | 40                  |
| Received neoadjuvant chemotherapy | 3                       | 0                        | 0                     | 0                   |
| No neoadjuvant chemotherapy       | 21                      | 32                       | 30                    | 108                 |
| Unknown neoadjuvant chemotherapy  | 0                       | 0                        | 0                     | 0                   |

**Supplementary Table S3: Statistical comparisons of absolute methylation values for genes in the SAM40**

| Gene                      | <i>p</i> -value |                |                 |
|---------------------------|-----------------|----------------|-----------------|
|                           | Hyper vs Hypo   | Hypo vs Normal | Hyper vs Normal |
| ASCL2                     | 6.5E-01         | 2.3E-01        | 3.2E-01         |
| BIRC4                     | 5.3E-01         | 5.2E-01        | 5.4E-01         |
| BMP3                      | 7.1E-03         | 7.4E-02        | 9.3E-02         |
| BMP6                      | 4.9E-01         | 2.2E-03        | 7.9E-03         |
| CD40                      | 1.4E-01         | 3.7E-02        | 3.7E-03         |
| CDKN1C                    | 2.1E-01         | 4.7E-04        | 3.3E-04         |
| COL1A2                    | 1.9E-01         | 1.7E-02        | 2.1E-02         |
| DES                       | 9.8E-01         | 8.4E-02        | 2.4E-01         |
| DKC1                      | 1.7E-01         | 5.3E-03        | 8.2E-05         |
| DLK1                      | 4.2E-01         | 8.0E-03        | 1.1E-02         |
| EGFR                      | 8.7E-03         | 1.4E-03        | 1.6E-03         |
| ESR2                      | 3.6E-03         | 1.5E-01        | 5.5E-03         |
| ETS1                      | 2.6E-04         | 1.1E-03        | 8.2E-05         |
| ETV1                      | 1.8E-04         | 9.8E-07        | 8.2E-05         |
| FES                       | 2.9E-01         | 4.3E-02        | 1.6E-03         |
| FLT4                      | 1.3E-03         | 2.6E-04        | 8.2E-05         |
| HOXA11                    | 5.2E-05         | 3.3E-01        | 8.2E-05         |
| ICAM1                     | 8.8E-01         | 2.5E-01        | 2.4E-01         |
| IRAK3                     | 1.5E-01         | 8.0E-01        | 5.9E-02         |
| KIT                       | 1.3E-02         | 7.4E-02        | 8.2E-05         |
| KRT13                     | 3.8E-02         | 5.3E-03        | 6.7E-01         |
| LYN                       | 1.6E-02         | 1.4E-02        | 2.0E-01         |
| MAS1                      | 3.5E-01         | 6.5E-03        | 7.9E-03         |
| MKRN3                     | 7.0E-01         | 9.6E-03        | 5.5E-03         |
| MYBL2                     | 3.8E-02         | 2.3E-01        | 5.8E-04         |
| PALM2-AKAP2               | 1.1E-01         | 8.0E-01        | 2.1E-02         |
| PAX6                      | 9.4E-04         | 1.2E-05        | 8.2E-05         |
| PCDH1                     | 4.2E-01         | 7.2E-01        | 3.2E-01         |
| PDGFRB                    | 1.7E-01         | 1.4E-03        | 5.5E-03         |
| PEG10                     | 9.3E-01         | 6.0E-01        | 6.1E-01         |
| PITX2                     | 1.8E-04         | 7.2E-01        | 8.2E-05         |
| SFRP1                     | 3.6E-03         | 4.5E-01        | 2.5E-03         |
| TERT                      | 2.7E-02         | 1.5E-01        | 5.8E-04         |
| TMEFF1                    | 7.1E-03         | 9.8E-07        | 8.2E-05         |
| TNFRSF10C                 | 2.1E-01         | 6.4E-01        | 4.2E-01         |
| TNFSF8                    | 6.1E-01         | 6.3E-04        | 2.1E-02         |
| TMEFF2                    | 3.7E-04         | 2.7E-02        | 8.2E-05         |
| WNT1                      | 4.9E-01         | 9.5E-02        | 9.3E-02         |
| WT1                       | 3.6E-03         | 9.8E-07        | 8.2E-05         |
| # <i>p</i> -values < 0.05 | 18              | 21             | 27              |
